# Supplementary material for: Template copy number and the sensitivity of quantitative PCR for Plasmodium falciparum in asymptomatic individuals
Source: PubMed Central journal article supplement (PMC7436962; doi:10.1186/s12936-020-03365-8), 2020-08-18
Supplement: 12936_2020_3365_MOESM1_ESM.pdf [file 12936_2020_3365_MOESM1_ESM.pdf]

Additional File 1.

$C_t$  values for *P. falciparum* 3D7 DNA using 3 different sources of reagents

Table A. Invitrogen Platinum™ Taq with Green PCR buffer

| qPCR assay template<br>copy number | $C_t$ values for $10^x$ pg of 3D7 DNA per qPCR |                 |                 |      |      |      |
|------------------------------------|------------------------------------------------|-----------------|-----------------|------|------|------|
|                                    | -3                                             | -2              | -1              | 0    | 1    | 2    |
| <i>crt</i> [n=1]                   | <i>negative</i>                                | <i>negative</i> | 37.9            | 35.8 | 32.0 | 28.2 |
| <i>crt76K</i> [n=1]                | <i>negative</i>                                | <i>negative</i> | <i>negative</i> | 38.0 | 36.3 | 27.1 |
| <i>ldh(a)</i> [n=1]                | <i>negative</i>                                | <i>negative</i> | 37.9            | 34.9 | 31.7 | 27.8 |
| <i>18SrRNA(a)</i> [n=3]            | <i>negative</i>                                | <i>negative</i> | 39.2            | 33.3 | 29.9 | 26.5 |
| <i>r364(a)</i> [n=14]              | <i>negative</i>                                | <i>negative</i> | 33.5            | 30.0 | 26.4 | 22.6 |
| <i>cytb</i> [n=22]                 | <i>negative</i>                                | <i>negative</i> | 32.9            | 28.8 | 25.4 | 21.8 |
| <i>coxI</i> [n=22]                 | <i>negative</i>                                | 36.4            | 33.1            | 29.6 | 25.8 | 22.4 |
| <i>varATS</i> [n=29]               | <i>negative</i>                                | 37.2            | 33.9            | 30.3 | 26.9 | 23.4 |
| <i>r364(b)</i> [n=56]              | <i>negative</i>                                | <i>negative</i> | 34.9            | 30.9 | 27.4 | 24.0 |

Table B. New England Biolabs Luna® Universal Probe qPCR

| qPCR assay template<br>copy number | $C_t$ values for $10^x$ pg of 3D7 DNA per qPCR |                 |                 |      |      |      |
|------------------------------------|------------------------------------------------|-----------------|-----------------|------|------|------|
|                                    | -3                                             | -2              | -1              | 0    | 1    | 2    |
| <i>crt</i> [n=1]                   | <i>negative</i>                                | <i>negative</i> | 37.0            | 32.9 | 29.5 | 25.9 |
| <i>crt76K</i> [n=1]                | <i>negative</i>                                | <i>negative</i> | <i>negative</i> | 36.1 | 32.1 | 28.7 |
| <i>ldh(a)</i> [n=1]                | <i>negative</i>                                | <i>negative</i> | 37.2            | 35.1 | 31.1 | 26.3 |
| <i>18SrRNA(a)</i> [n=3]            | <i>negative</i>                                | 38.5            | 35.6            | 33.1 | 29.5 | 25.4 |
| <i>r364(a)</i> [n=14]              | <i>negative</i>                                | 36.4            | 33.7            | 30.1 | 26.5 | 22.7 |
| <i>cytb</i> [n=22]                 | <i>negative</i>                                | 36.5            | 32.8            | 28.9 | 25.5 | 22.4 |
| <i>coxI</i> [n=22]                 | <i>negative</i>                                | 33.9            | 31.4            | 27.8 | 23.9 | 20.5 |
| <i>varATS</i> [n=29]               | <i>negative</i>                                | 38.3            | 33.8            | 30.1 | 26.7 | 23.0 |
| <i>r364(b)</i> [n=56]              | <i>negative</i>                                | 37.0            | 34.1            | 30.7 | 27.1 | 23.6 |

Table C. Quantabio PerfeCTa qPCR ToughMix™

| qPCR assay template copy number | C <sub>t</sub> values for 10 <sup>x</sup> pg of 3D7 DNA per qPCR |                 |                 |                 |                 |                 |
|---------------------------------|------------------------------------------------------------------|-----------------|-----------------|-----------------|-----------------|-----------------|
|                                 | -3                                                               | -2              | -1              | 0               | 1               | 2               |
| <i>crt</i> [n=1]                | <i>negative</i>                                                  | <i>negative</i> | <i>negative</i> | <i>negative</i> | <i>negative</i> | <i>negative</i> |
| <i>crf76K</i> [n=1]             | <i>negative</i>                                                  | 38.2            | 35.6            | 34.4            | 30.8            | 27.8            |
| <i>ldh(a)</i> [n=1]             | <i>negative</i>                                                  | <i>negative</i> | 38.8            | 36.0            | 32.5            | 29.4            |
| <i>18SrRNA(a)</i> [n=3]         | <i>negative</i>                                                  | <i>negative</i> | 37.5            | 33.7            | 30.4            | 27.4            |
| <i>r364(a)</i> [n=14]           | <i>negative</i>                                                  | <i>negative</i> | 37.7            | 33.4            | 29.8            | 25.7            |
| <i>cytb</i> [n=22]              | <i>negative</i>                                                  | 38.4            | 34.5            | 30.4            | 27.1            | 23.6            |
| <i>coxI</i> [n=22]              | <i>negative</i>                                                  | 38.8            | 34.4            | 30.3            | 26.9            | 24.4            |
| <i>varATS</i> [n=29]            | <i>negative</i>                                                  | 37.1            | 34.5            | 31.3            | 27.6            | 23.9            |
| <i>r364(b)</i> [n=56]           | <i>negative</i>                                                  | <i>negative</i> | 36.8            | 32.9            | 29.5            | 26.3            |

These tables indicate that C<sub>t</sub> values were fundamentally similar for 9 qPCR assays with template copy numbers from 1 to 56 using reagents from 3 different manufacturers. The *crt* assay, which yielded false-negative qPCR results with Quantabio reagents, was an exception to that generalization.
