# Supplementary material for: Template copy number and the sensitivity of quantitative PCR for Plasmodium falciparum in asymptomatic individuals
Source: PubMed Central journal article supplement (PMC7436962; doi:10.1186/s12936-020-03365-8), 2020-08-18
Supplement: 12936_2020_3365_MOESM3_ESM.pdf [file 12936_2020_3365_MOESM3_ESM.pdf]

Additional File 3.

Mean  $C_t$  values and standard deviations for DNA standards based on qPCR assays in ascending order by template copy number

Table A. *P. falciparum* 3D7 DNA standards

| qPCR assay        | Mean $C_t$ values $\pm$ standard deviations for $10^x$ pg of 3D7 DNA |                 |                 |                 |                |                |                |                |
|-------------------|----------------------------------------------------------------------|-----------------|-----------------|-----------------|----------------|----------------|----------------|----------------|
|                   | -4                                                                   | -3              | -2              | -1              | 0              | 1              | 2              | 3              |
| <i>crt</i>        | <i>negative</i>                                                      | <i>negative</i> | <i>negative</i> | <i>negative</i> | $34.7 \pm 0.5$ | $31.0 \pm 0.1$ | $27.7 \pm 0.0$ | $24.2 \pm 0.1$ |
| <i>ldh(a)</i>     | <i>negative</i>                                                      | <i>negative</i> | <i>negative</i> | $37.4 \pm 0.1$  | $34.9 \pm 1.2$ | $30.7 \pm 0.4$ | $27.0 \pm 0.0$ | $24.0 \pm 0.4$ |
| <i>ldh(b)</i>     | <i>negative</i>                                                      | <i>negative</i> | <i>negative</i> | $38.0 \pm 0.8$  | $34.7 \pm 0.2$ | $30.3 \pm 0.1$ | $26.4 \pm 0.0$ | $23.1 \pm 0.0$ |
| <i>18SrRNA(a)</i> | <i>negative</i>                                                      | <i>negative</i> | <i>negative</i> | $36.3 \pm 0.5$  | $32.7 \pm 0.7$ | $29.0 \pm 0.3$ | $25.7 \pm 0.4$ | $22.7 \pm 0.6$ |
| <i>18SrRNA(b)</i> | <i>negative</i>                                                      | <i>negative</i> | <i>negative</i> | $36.0 \pm 0.7$  | $32.4 \pm 0.8$ | $29.3 \pm 0.2$ | $25.9 \pm 0.1$ | $22.4 \pm 0.1$ |
| <i>cytb</i>       | <i>negative</i>                                                      | <i>negative</i> | $37.8 \pm 0.8$  | $33.8 \pm 0.5$  | $29.9 \pm 0.2$ | $26.4 \pm 0.2$ | $22.6 \pm 0.2$ | $19.9 \pm 0.6$ |
| <i>coxI</i>       | <i>negative</i>                                                      | <i>negative</i> | $36.8 \pm 0.0$  | $33.1 \pm 0.2$  | $29.4 \pm 0.2$ | $26.0 \pm 0.0$ | $22.6 \pm 0.0$ | $19.1 \pm 0.0$ |
| <i>varATS</i>     | <i>negative</i>                                                      | <i>negative</i> | $35.9 \pm 1.0$  | $33.8 \pm 0.5$  | $29.1 \pm 0.2$ | $25.6 \pm 0.1$ | $21.8 \pm 0.0$ | $18.8 \pm 0.1$ |
| r364(b)           | <i>negative</i>                                                      | <i>negative</i> | $36.8 \pm 2.1$  | $33.5 \pm 0.2$  | $29.7 \pm 0.2$ | $24.9 \pm 0.1$ | $22.6 \pm 0.1$ | $19.3 \pm 0.1$ |
| TARE-2            | <i>negative</i>                                                      | <i>negative</i> | $35.4 \pm 2.0$  | $31.1 \pm 0.6$  | $26.7 \pm 0.1$ | $22.7 \pm 0.4$ | $18.9 \pm 0.1$ | $15.6 \pm 0.2$ |

Table B. *P. falciparum* Dd2 DNA standards

| qPCR Assay        | Mean C <sub>t</sub> values ± standard deviations for 10 <sup>x</sup> pg of Dd2 DNA |                 |                 |            |            |            |            |            |
|-------------------|------------------------------------------------------------------------------------|-----------------|-----------------|------------|------------|------------|------------|------------|
|                   | -4                                                                                 | -3              | -2              | -1         | 0          | 1          | 2          | 3          |
| <i>crt</i>        | <i>negative</i>                                                                    | <i>negative</i> | <i>negative</i> | 37.6 ± 0.5 | 34.1 ± 0.2 | 30.6 ± 0.1 | 27.2 ± 0.2 | 24.7 ± 1.6 |
| <i>ldh(a)</i>     | <i>negative</i>                                                                    | <i>negative</i> | 38.2 ± 0.7      | 36.5 ± 0.3 | 33.7 ± 0.8 | 30.0 ± 0.4 | 26.5 ± 0.3 | 23.5 ± 0.7 |
| <i>ldh(b)</i>     | <i>negative</i>                                                                    | <i>negative</i> | <i>negative</i> | 36.3 ± 0.5 | 33.9 ± 0.1 | 29.4 ± 0.1 | 25.6 ± 0.1 | 22.2 ± 0.1 |
| <i>18SrRNA(a)</i> | <i>negative</i>                                                                    | <i>negative</i> | 37.9 ± 0.8      | 34.1 ± 0.3 | 31.2 ± 0.6 | 27.6 ± 0.2 | 24.2 ± 0.4 | 20.8 ± 0.2 |
| <i>18SrRNA(b)</i> | <i>negative</i>                                                                    | <i>negative</i> | 37.7 ± 0.1      | 35.1 ± 0.8 | 31.8 ± 0.4 | 27.9 ± 0.4 | 24.5 ± 0.4 | 21.2 ± 0.5 |
| <i>cytb</i>       | <i>negative</i>                                                                    | 38.7 ± 0.5      | 35.9 ± 1.1      | 31.3 ± 0.3 | 28.5 ± 0.2 | 24.7 ± 0.2 | 20.9 ± 0.1 | 18.2 ± 0.4 |
| <i>coxI</i>       | <i>negative</i>                                                                    | 38.1 ± 1.8      | 34.6 ± 0.4      | 31.3 ± 0.3 | 28.0 ± 0.2 | 24.3 ± 0.1 | 20.9 ± 0.0 | 17.5 ± 0.1 |
| <i>varATS</i>     | <i>negative</i>                                                                    | <i>negative</i> | 35.8 ± 0.7      | 32.5 ± 0.2 | 29.1 ± 0.1 | 25.5 ± 0.0 | 21.7 ± 0.0 | 18.7 ± 0.1 |
| r364(b)           | <i>negative</i>                                                                    | <i>negative</i> | 36.3 ± 0.7      | 33.3 ± 0.3 | 29.7 ± 0.2 | 24.6 ± 0.1 | 22.4 ± 0.2 | 19.2 ± 0.0 |
| TARE-2            | 35.2 ± 2.4                                                                         | 36.2 ± 1.4      | 32.6 ± 0.6      | 30.0 ± 0.2 | 26.6 ± 0.1 | 22.2 ± 0.0 | 18.3 ± 0.1 | 15.1 ± 0.2 |

In these tables, the mean C<sub>t</sub> values and standard deviations of 3 independent replicates for the 10 qPCR assays examined are provided for *P. falciparum* 3D7 (Table A) and Dd2 (Table B) DNA from 10<sup>-5</sup> pg to 10<sup>+2</sup> pg DNA per qPCR. These data describe the linear dynamic range, precision and regression line (and thus PCR efficiency) of each assay.
