# Supplementary material for: Template copy number and the sensitivity of quantitative PCR for Plasmodium falciparum in asymptomatic individuals
Source: PubMed Central journal article supplement (PMC7436962; doi:10.1186/s12936-020-03365-8), 2020-08-18
Supplement: 12936_2020_3365_MOESM4_ESM.pdf [file 12936_2020_3365_MOESM4_ESM.pdf]

Additional File 4.

Clinical sensitivity of qPCR Assays for *P. falciparum* in 96 filter paper blots from smear-positive, asymptomatic subjects by parasite density and template copy number

| qPCR Assays       | Template Copy No. | Asexual Parasites per $\mu$ l by Microscopy ( $n = 24$ subjects per group) |          |             |             |          |
|-------------------|-------------------|----------------------------------------------------------------------------|----------|-------------|-------------|----------|
|                   |                   | $\leq 200$                                                                 | 201–999  | 1,000–1,999 | 2,000–5,000 | Totals   |
| <i>crt</i>        | 1                 | 4 (17%)                                                                    | 14 (58%) | 17 (71%)    | 19 (79%)    | 54 (56%) |
| <i>ldh(a)</i>     | 1                 | 4 (17%)                                                                    | 15 (63%) | 16 (67%)    | 20 (83%)    | 55 (57%) |
| <i>ldh(b)</i>     | 1                 | 6 (25%)                                                                    | 14 (58%) | 16 (67%)    | 20 (83%)    | 56 (59%) |
| <i>18SrRNA(a)</i> | 3                 | 8 (33%)                                                                    | 17 (71%) | 19 (79%)    | 19 (79%)    | 63 (66%) |
| <i>18SrRNA(b)</i> | 3                 | 7 (29%)                                                                    | 16 (67%) | 18 (75%)    | 20 (83%)    | 61 (64%) |
| <i>cytb</i>       | 22                | 10 (42%)                                                                   | 17 (71%) | 21 (88%)    | 22 (92%)    | 70 (73%) |
| <i>coxI</i>       | 22                | 11 (46%)                                                                   | 17 (71%) | 19 (79%)    | 21 (88%)    | 68 (71%) |
| <i>varATS</i>     | 29                | 10 (42%)                                                                   | 17 (71%) | 21 (88%)    | 21 (88%)    | 69 (72%) |
| <i>r364(b)</i>    | 56                | 9 (38%)                                                                    | 18 (75%) | 19 (79%)    | 20 (83%)    | 66 (69%) |
| TARE-2            | 160               | 11 (46%)                                                                   | 19 (79%) | 22 (92%)    | 22 (92%)    | 74 (77%) |

This table shows the individual clinical sensitivities of 10 qPCR assays for *P. falciparum* in filter paper blots from smear-positive, asymptomatic subjects increased with parasite densities from thick smears and template copy number of qPCR assay.
